# Supplementary material for: Development and Validation of a Novel LC-MS/MS Method for the Simultaneous Determination of Abemaciclib, Palbociclib, Ribociclib, Anastrozole, Letrozole, and Fulvestrant in Plasma Samples: A Prerequisite for Personalized Breast Cancer Treatment
Source: MDPI journal article supplement (doi:10.3390/ph15050614), 2022-05-16
Supplement: s1 [file s1]

## Supplementary materials

# Development and Validation of a Novel LC-MS/MS Method for the Simultaneous Determination of Abemaciclib, Palbociclib, Ribociclib, Anastrozole, Letrozole, and Fulvestrant in Plasma Samples: A Prerequisite for Personalized Breast Cancer Treatment

Lu Turković <sup>1</sup>, Luka Bočkor <sup>2</sup>, Oscar Ekpenyong <sup>3</sup>, Tajana Silovski <sup>4</sup>, Mila Lovrić <sup>5,6</sup>, Slaven Crnković <sup>7</sup>, Biljana Nigović <sup>1</sup> and Miranda Sertić <sup>1,\*</sup>

- <sup>1</sup> Department of Pharmaceutical Analysis, Faculty of Pharmacy and Biochemistry, University of Zagreb, Ante Kovacica 1, 10000 Zagreb, Croatia; lu.turkovic@pharma.unizg.hr (L.T.); bnigovic@pharma.hr (B.N.)
- <sup>2</sup> Centre for Applied Bioanthropology, Institute for Anthropological Research, Ljudevita Gaja 32, 10000 Zagreb, Croatia; lbockor@inantro.hr
- <sup>3</sup> ADME & Discovery Toxicology, Merck & Co., Inc., South San Francisco, CA 94080, USA; oscar.ekpenyong@merck.com
- <sup>4</sup> Department of Oncology, University Hospital Centre Zagreb, Kispaticeva 12, 10000 Zagreb, Croatia; tsilovsk@kbc-zagreb.hr
- <sup>5</sup> Department of Laboratory Diagnostics, University Hospital Centre Zagreb, Kispaticeva 12, 10000 Zagreb, Croatia; mila.lovric@kbc-zagreb.hr
- <sup>6</sup> Faculty of Pharmacy and Biochemistry, University of Zagreb, Ante Kovacica 1, 10000 Zagreb, Croatia; mila.lovric@kbc-zagreb.hr
- <sup>7</sup> Division of Physiology, Medical University of Graz, Ludwig Boltzmann Institute for Lung and Vascular Research, Neue Stiftingtalstrasse 6/V, 8010 Graz, Austria; slaven.crnkovic@medunigraz.at
- \* Correspondence: miranda.sertic@pharma.unizg.hr; Tel.: +385-1-6394-473

Section 1. Chromatograms and MS/MS spectra of the analyzed single-point patient samples:

### Patient 1 (ABE + LET)

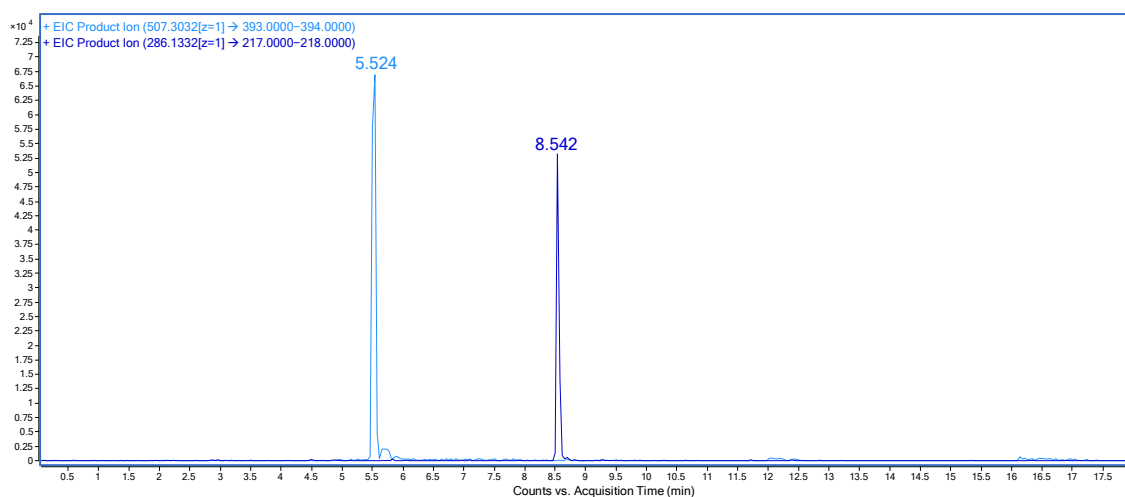

Figure S1. EIC of ABE (transition  $m/z$  507.3→393.2) and LET (transition  $m/z$  286.1→217.1).

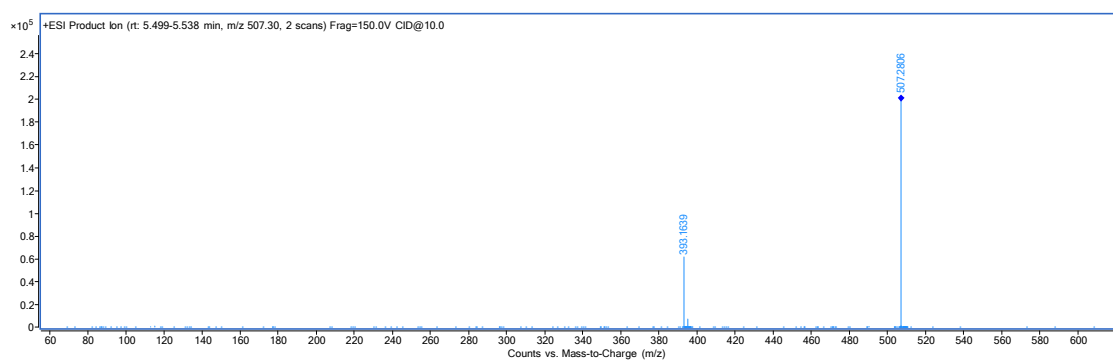

**Figure S2.** Mass spectrum of peak 1 (ABE, tr 5.524 min).

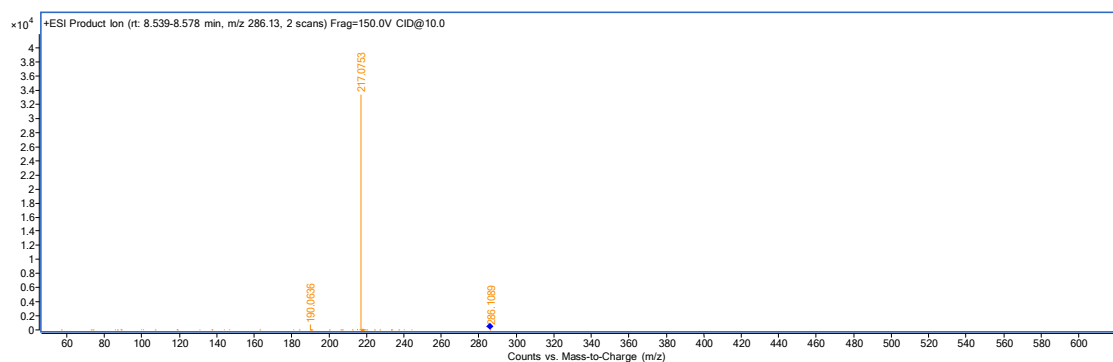

**Figure S3.** Mass spectrum of peak 2 (LET, tr 8.542 min).

## Patient 2 (RIB + LET)

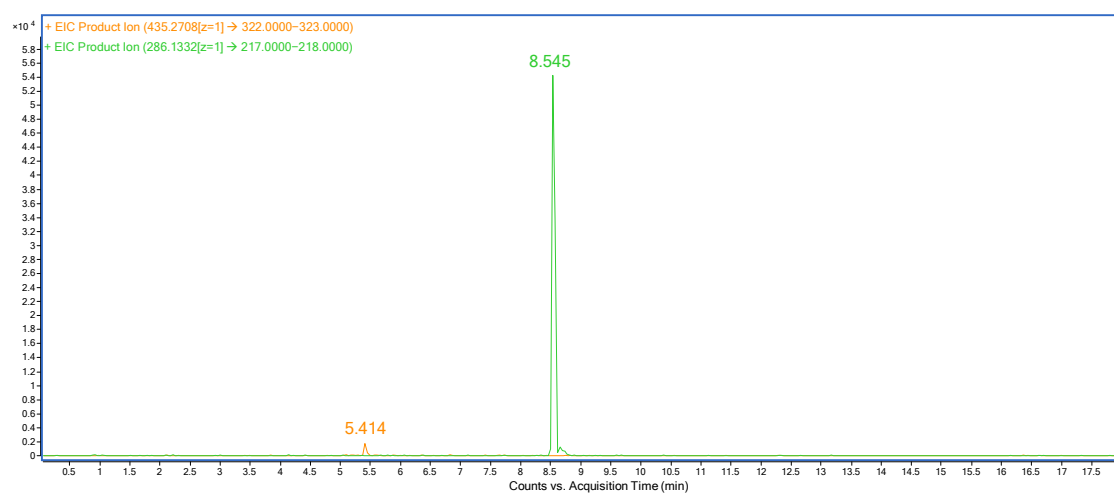

**Figure S4.** EIC of RIB (transition  $m/z$  435.3→322.1) and LET (transition  $m/z$  286.1→217.1).

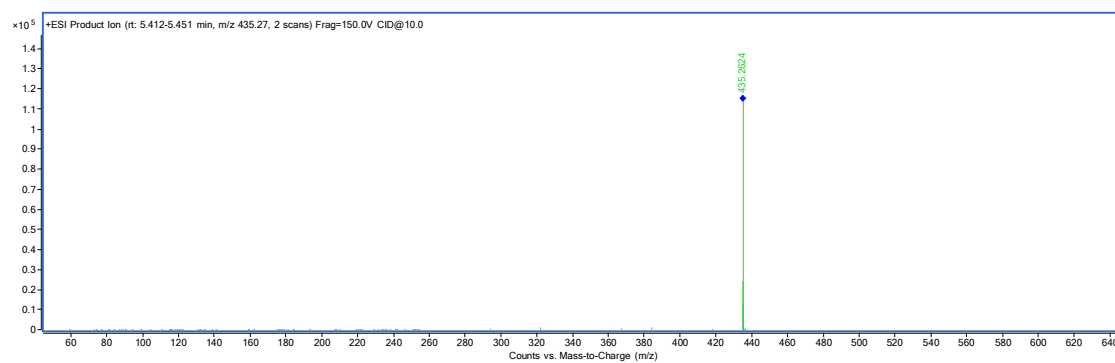

**Figure S5.** Mass spectrum of peak 1 (RIB, tr 5.414 min).

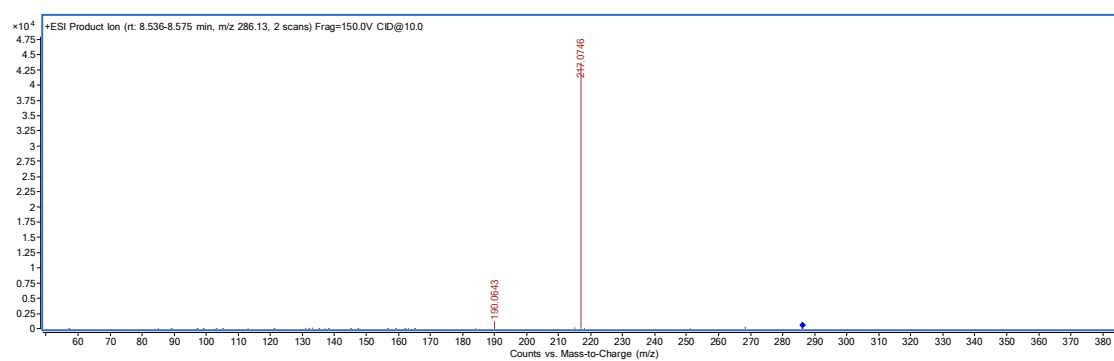

**Figure S6.** Mass spectrum of peak 2 (LET, tr 8.545 min).

### Patient 3 (RIB + LET)

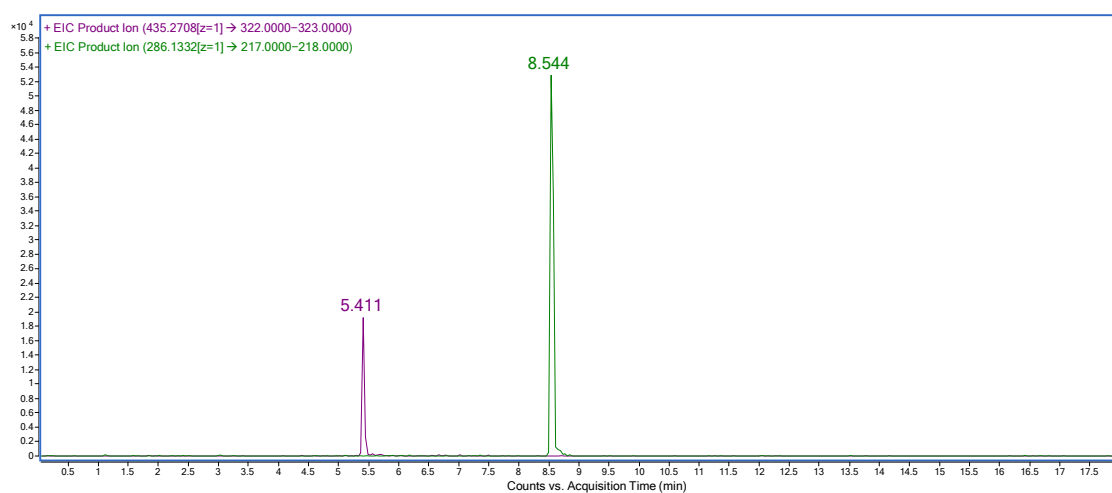

**Figure S7.** EIC of RIB (transition  $m/z$  435.3→322.1) and LET (transition  $m/z$  286.1→217.1).

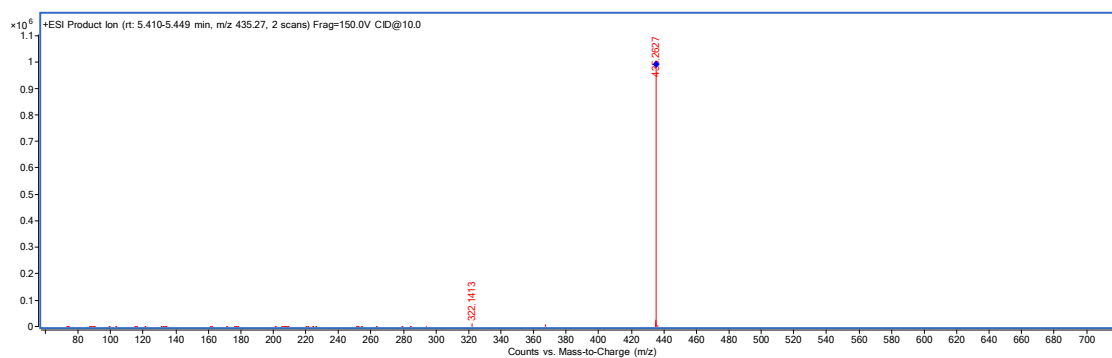

**Figure S8.** Mass spectrum of peak 1 (RIB, tr 5.411 min).

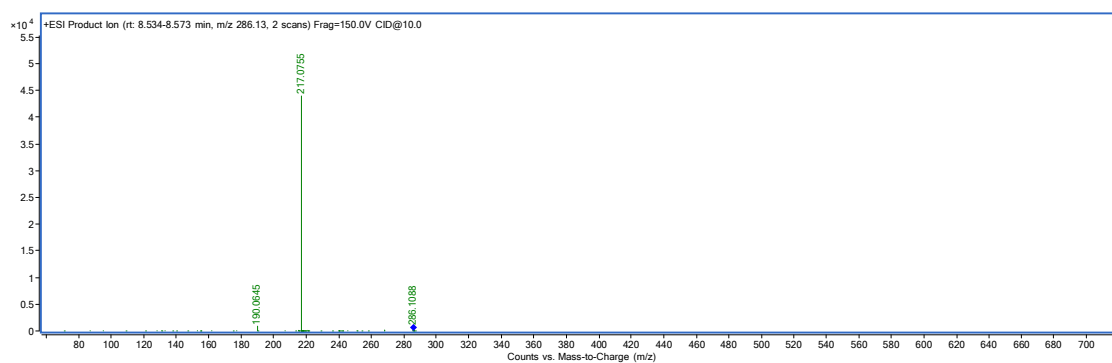

**Figure S9.** Mass spectrum of peak 2 (LET, tr 8.544 min).

## Patient 4 (RIB + LET)

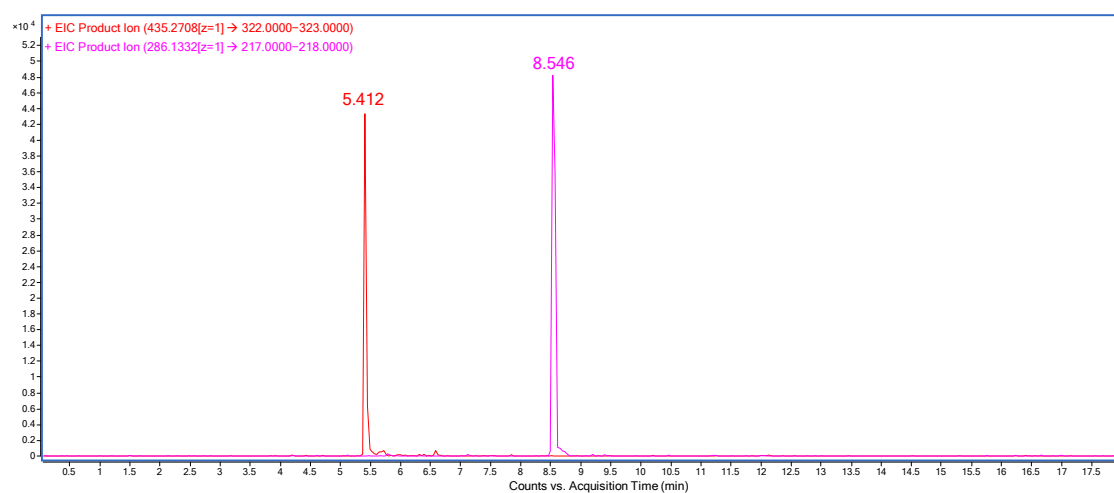

**Figure S10.** EIC of RIB (transition  $m/z$  435.3  $\rightarrow$  322.1) and LET (transition  $m/z$  286.1  $\rightarrow$  217.1).

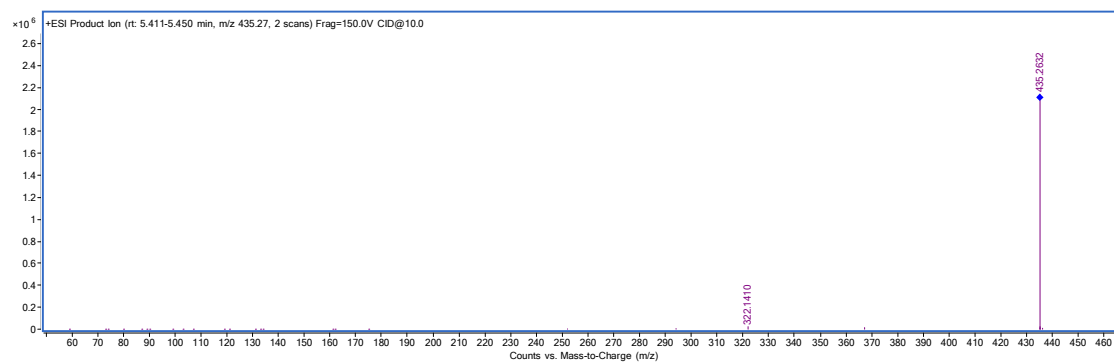

**Figure S11.** Mass spectrum of peak 1 (RIB, tr 5.412 min).

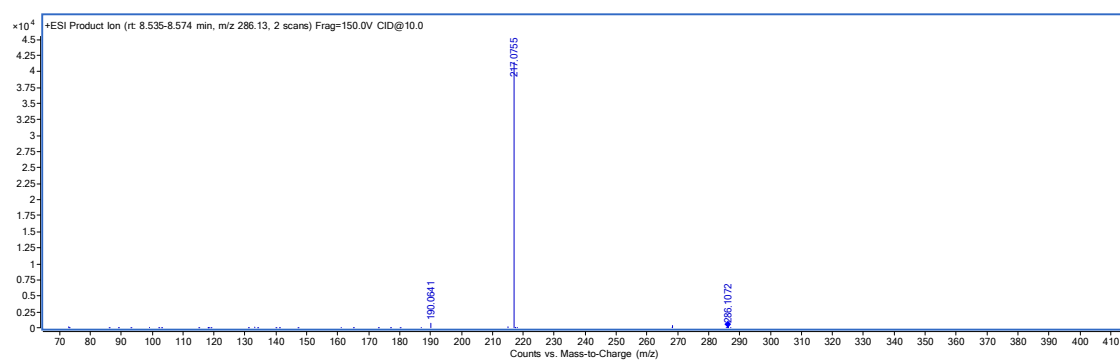

**Figure S12.** Mass spectrum of peak 2 (LET, tr 8.546 min).

## Patient 5 (RIB + ANA)

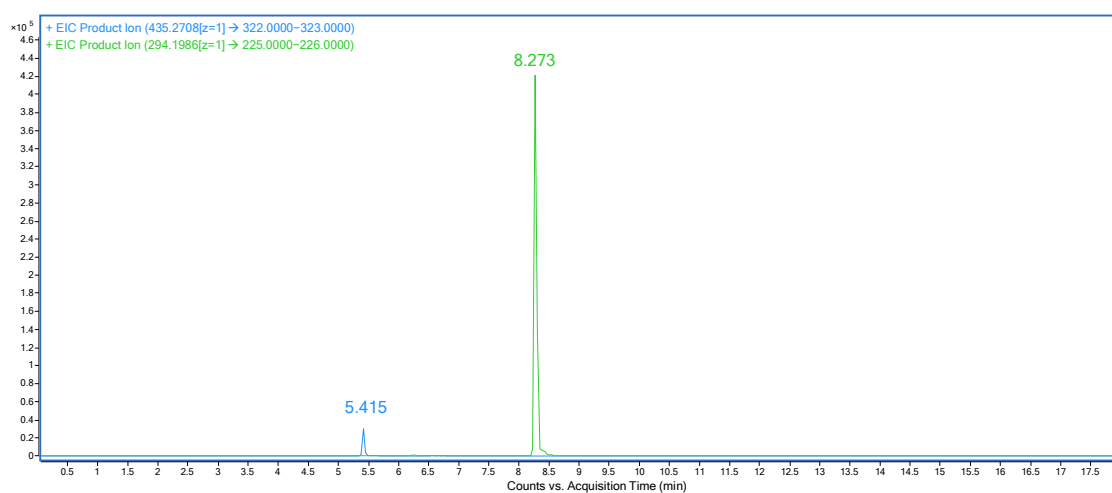

**Figure S13.** EIC of RIB (transition  $m/z$  435.3→322.1) and ANA (transition  $m/z$  294.2→225.1).

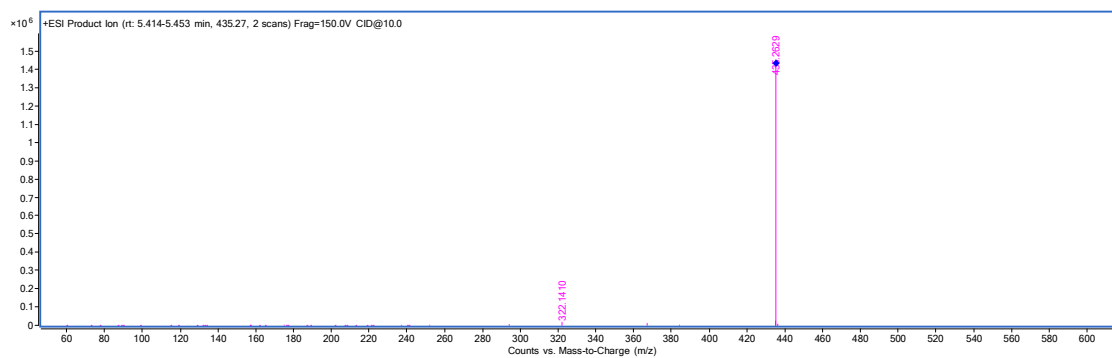

**Figure S14.** Mass spectrum of peak 1 (RIB, tr 5.415 min).

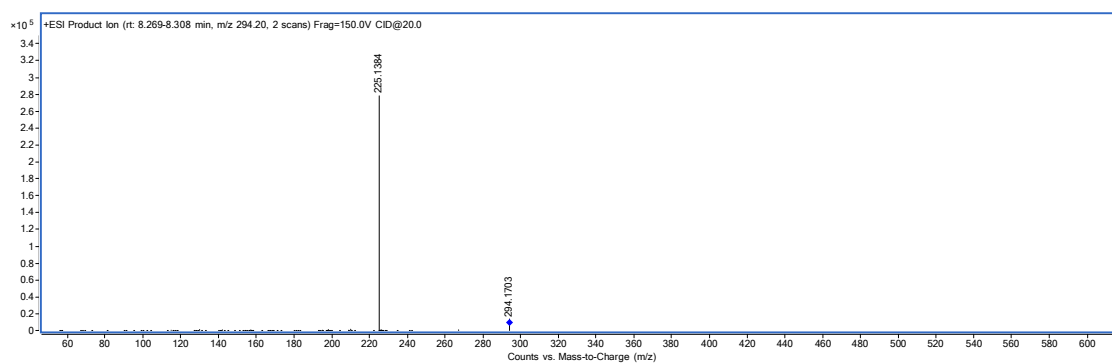

**Figure S15.** Mass spectrum of peak 2 (ANA, tr 8.273 min).

## Patient 6 (RIB + EXE)

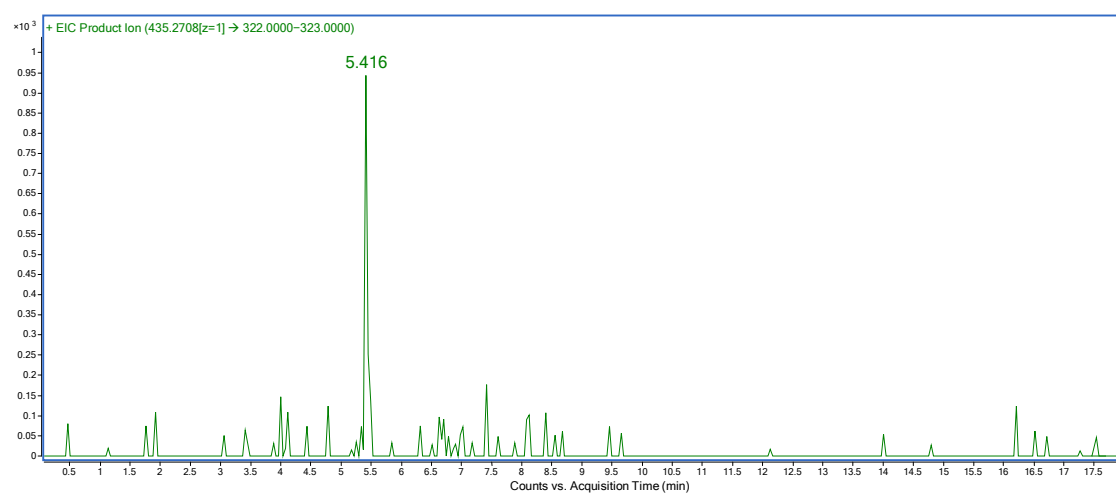

Figure S16. EIC of RIB (transition  $m/z$  435.3  $\rightarrow$  322.1).

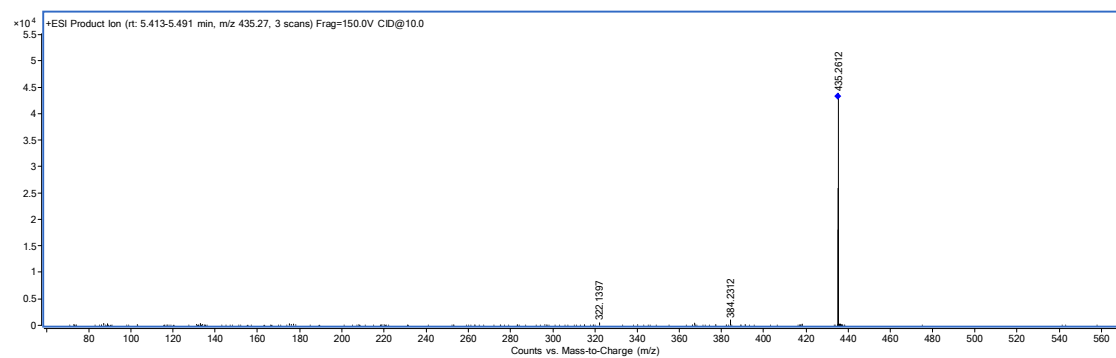

Figure S17. Mass spectrum of the peak (RIB, tr 5.416 min).

## Patient 7 (RIB + FUL)

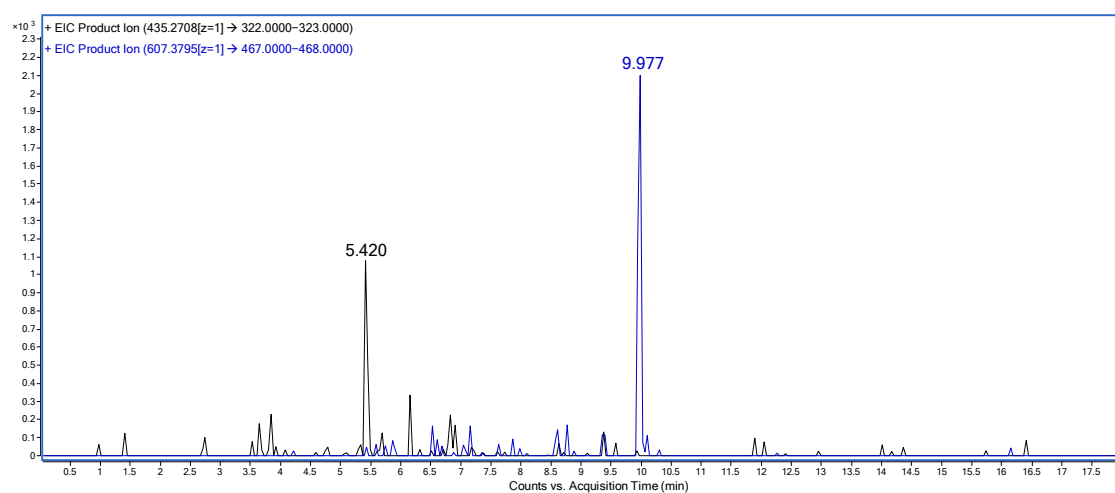

**Figure S18.** EIC of RIB (transition  $m/z$  435.3  $\rightarrow$  322.1) and FUL (transition  $m/z$  607.4  $\rightarrow$  467.2).

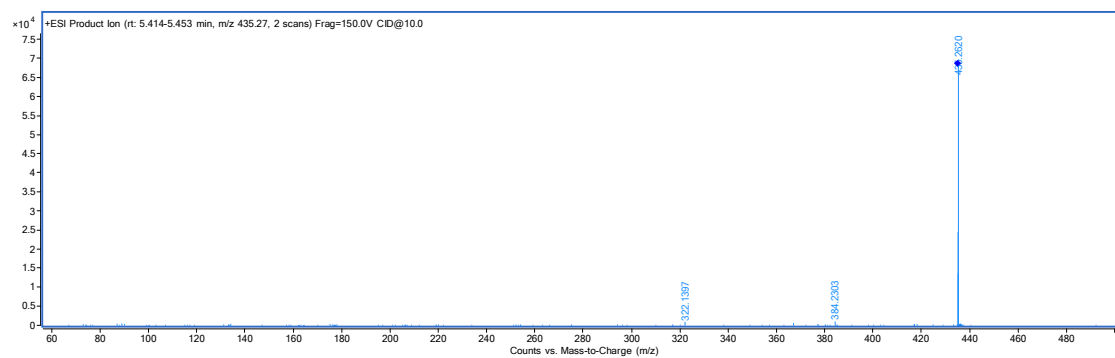

**Figure S19.** Mass spectrum of peak 1 (RIB, tr 5.420 min).

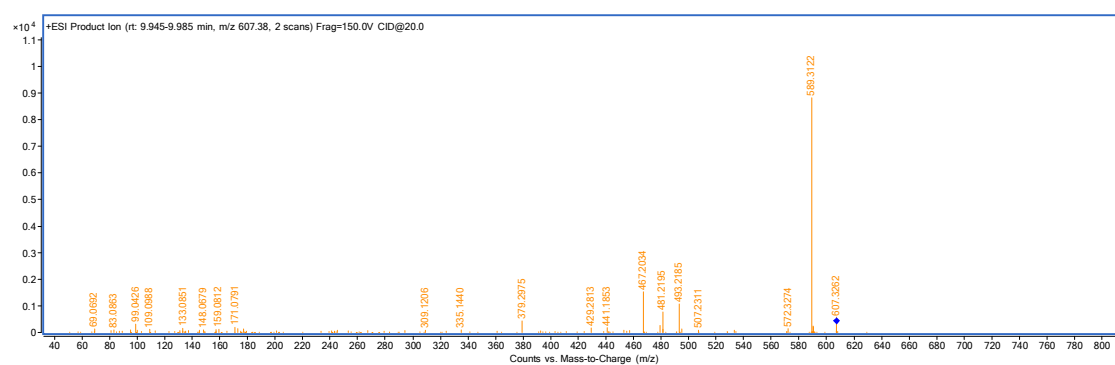

**Figure S20.** Mass spectrum of peak 2 (FUL, tr 9.977 min).



## Patient 8 (PAL + FUL)

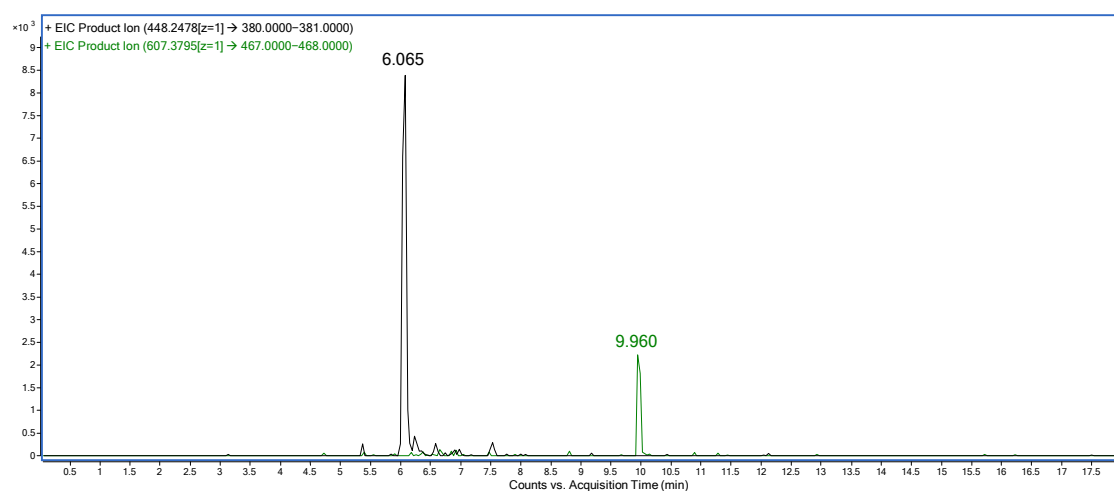

Figure S21. EIC of PAL (transition  $m/z$  448.3→380.2) and FUL (transition  $m/z$  607.4→467.2).

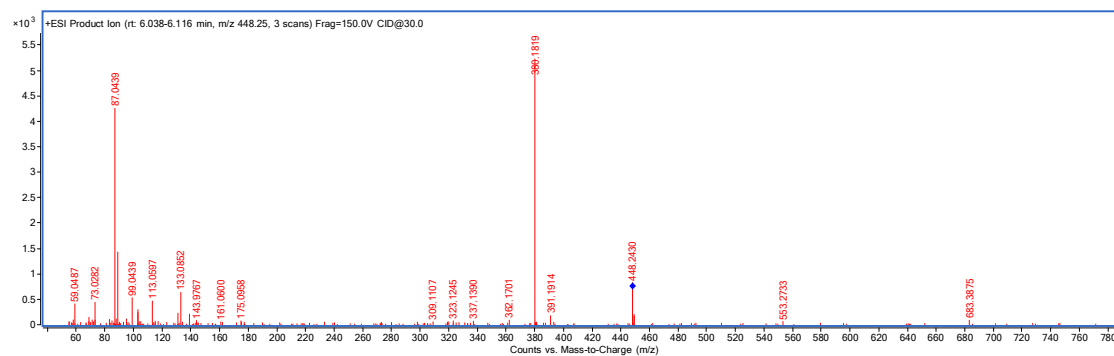

Figure S22. Mass spectrum of peak 1 (PAL, tr 6.065 min).

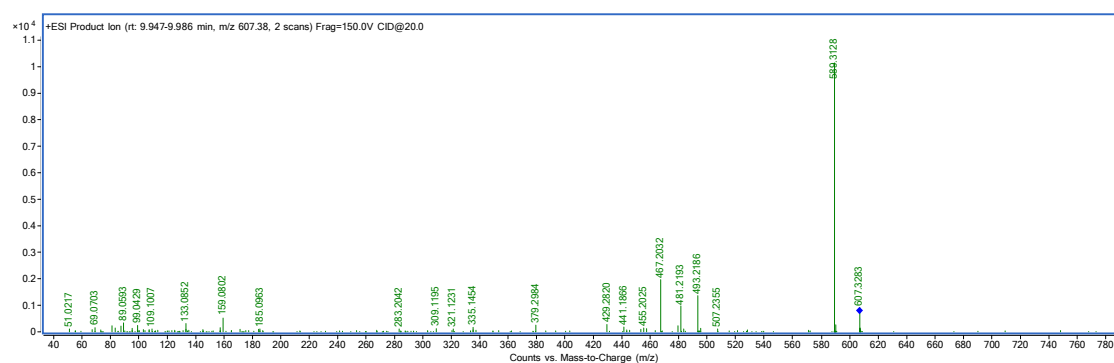

Figure S23. Mass spectrum of peak 2 (FUL, tr 9.960 min).

## Patient 9 (PAL + FUL)

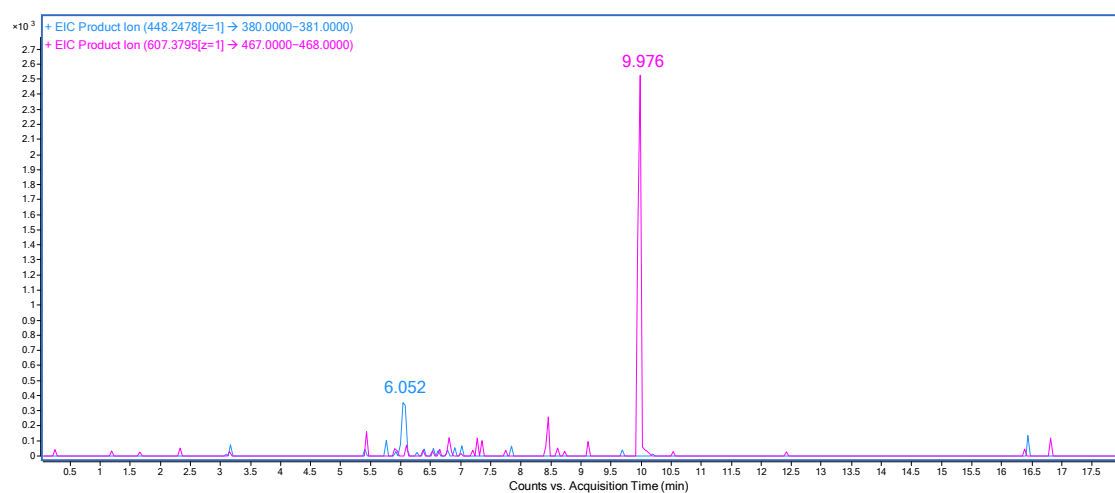

**Figure S24.** EIC of PAL (transition  $m/z$  448.3 $\rightarrow$ 380.2) and FUL (transition  $m/z$  607.4 $\rightarrow$ 467.2).

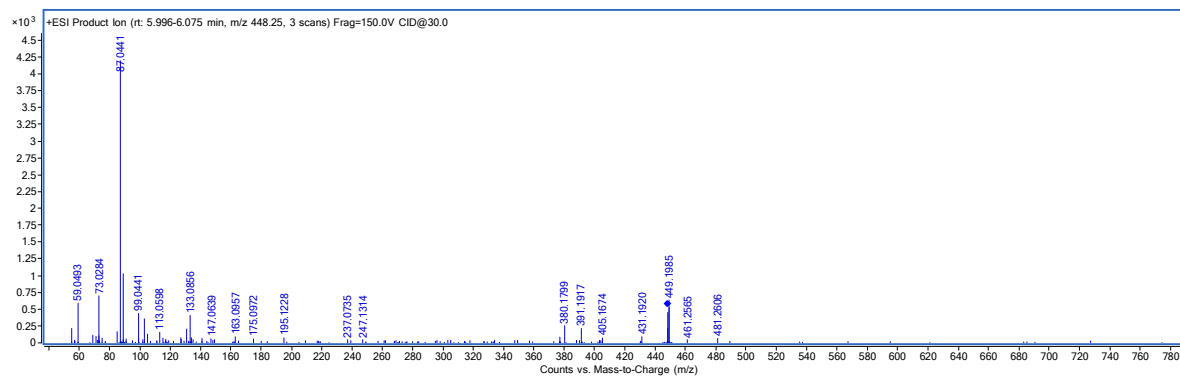

**Figure S25.** Mass spectrum of peak 1 (PAL, tr 6.052 min).

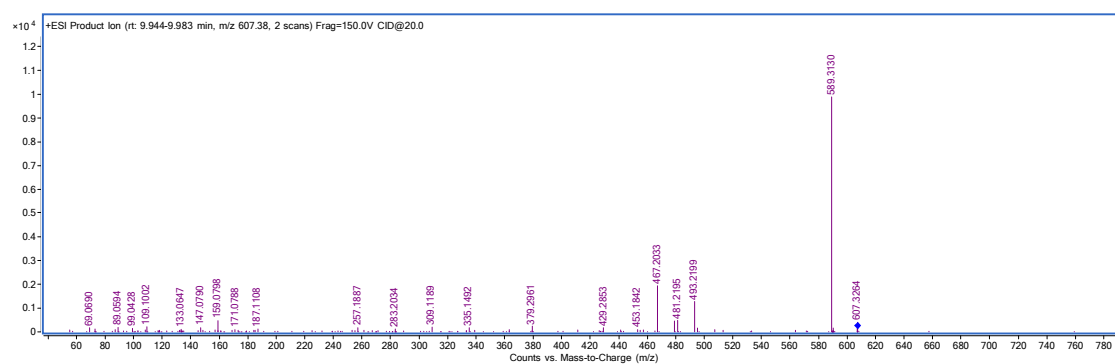

**Figure S26.** Mass spectrum of peak 2 (FUL, tr 9.976 min).

## Patient 10 (PAL + FUL)

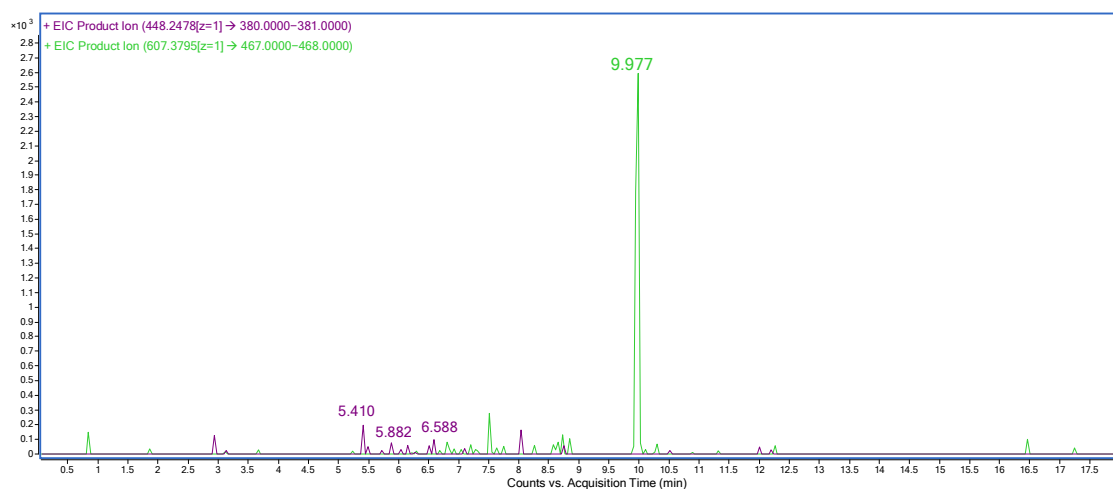

**Figure S27.** EIC of PAL (transition  $m/z$  448.3→380.2) and FUL (transition  $m/z$  607.4→467.2).

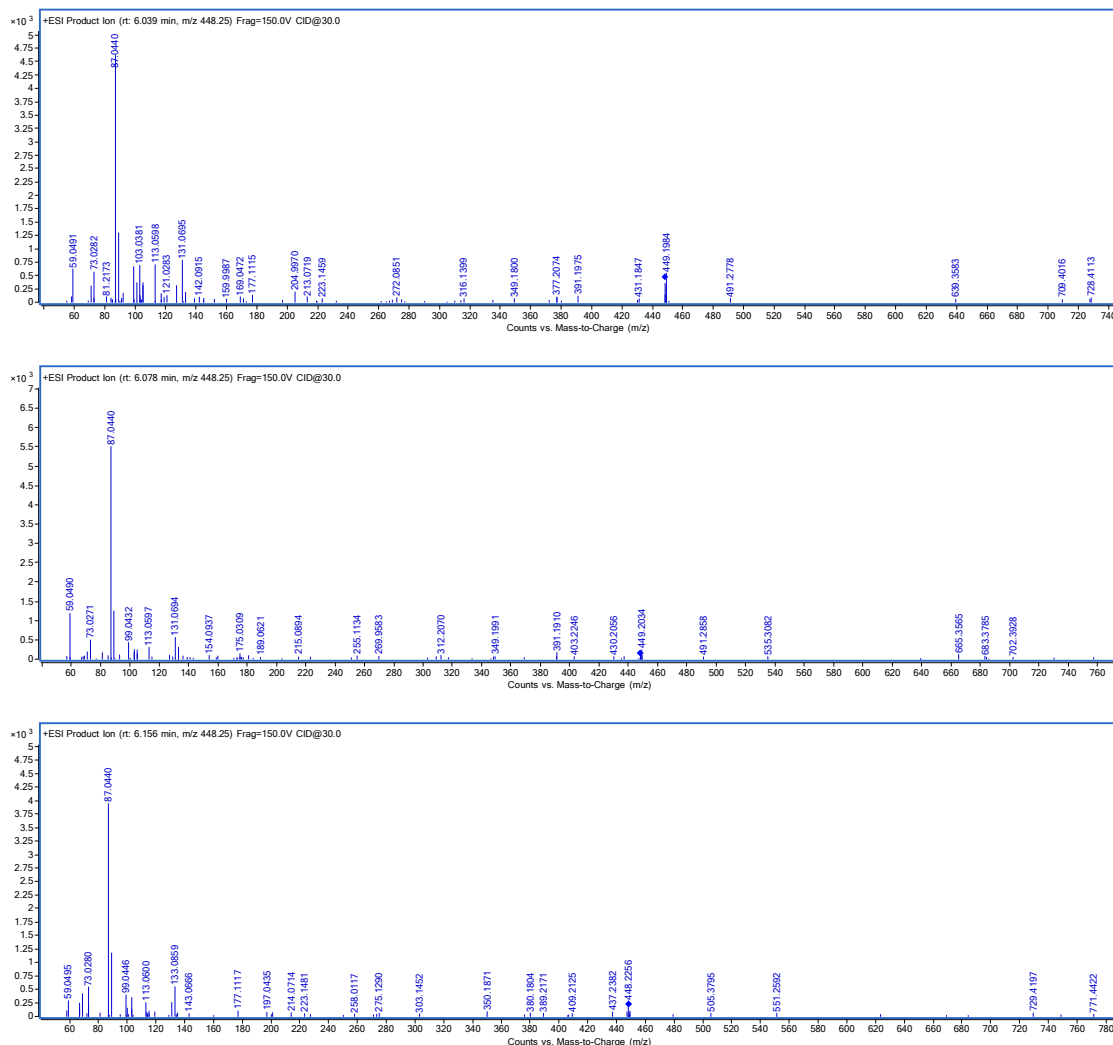

**Figure S28.** Mass spectra around the retention time of PAL, 6.0 min.

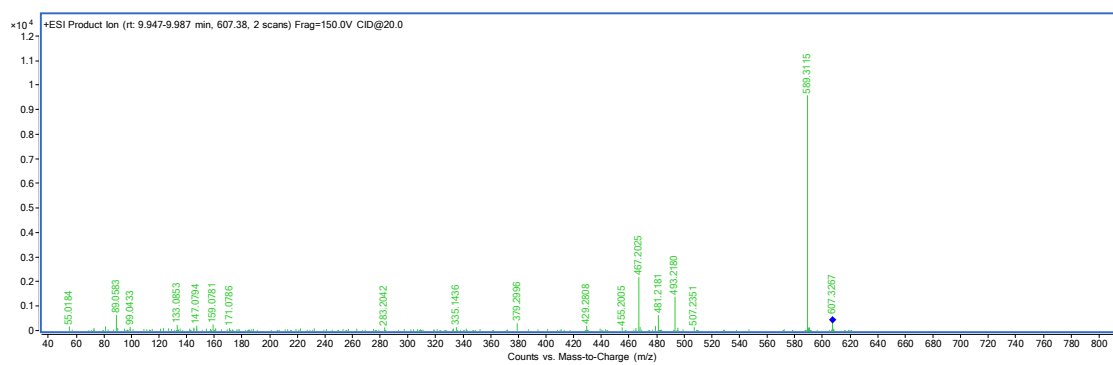

**Figure S29.** Mass spectrum of the peak (FUL, tr 9.977 min).

Section 2. Results of the pharmacokinetic study:

**Table S1.** Exact RIB plasma concentrations measured at each timepoint.

| <b>t<br/>(h)</b> | <b>C<sub>RIB</sub><br/>(ng/mL)</b> |
|------------------|------------------------------------|
| 0.00             | 944.84                             |
| 0.25             | 1051.75                            |
| 0.50             | 1235.13                            |
| 1.00             | 1519.81                            |
| 3.00             | 1830.10                            |
| 6.00             | 1713.58                            |
| 12.00            | 1501.88                            |
